1 **Title: Duckweed roots are dispensable and are on a trajectory toward vestigiality**

2

3 **Short title: Structural and functional reduction of duckweed roots**

4

5 Alex Ware<sup>1\*</sup>, Dylan H Jones<sup>1\*</sup>, Paulina Flis<sup>1,2</sup>, Kellie Smith<sup>2,3</sup>, Britta Kümpers<sup>1</sup>, Levi Yant<sup>2,3</sup>, Jonathan A  
6 Atkinson, Darren M Wells and Anthony Bishopp<sup>1</sup>

7

8 \* These authors contributed equally

9

10 <sup>1</sup> School of Biosciences, University of Nottingham, Sutton Bonington Campus, Loughborough, LE12 5RD,  
11 UK

12 <sup>2</sup> Future Food Beacon, University of Nottingham, Sutton Bonington Campus, Loughborough, LE12 5RD, UK

13 <sup>3</sup> School of Life Sciences, University of Nottingham, University Park Campus, Nottingham, NG7 2RD, UK

14

15

16 Author contributions

17 AW, BMK & AB designed the concept. AW and DJ performed anatomical analyses and monitored  
18 root function with support from JA. PF performed the ionomic profiling. KES aided with sampling for  
19 ionomics. AW & AB wrote the manuscript, with input from all authors.

20

21 Acknowledgements

22 We acknowledge the Nottingham Future Food Beacon for support with ionomics, and Walter  
23 Lämmle from the Landolt Duckweed Collection and Klaus J Appenroth from the Friedrich Schiller  
24 University for kindly supplying material used in this study.

25

26 One sentence summary: Through their adaption to the aquatic environment, duckweed roots have  
27 progressively become structurally reduced making them an ideal plant model with which to study  
28 vestigiality.

29

30 Funding:

31 This work was funded by a Research Project Grant from the Leverhulme Trust (RPG-2018-403). DJ  
32 and KES are funded by through the Biotechnology and Biological Sciences Research Council  
33 (BB/M008770/1).

34

35

36

37 **Abstract**

38

39 **Duckweeds are morphologically simplified, free floating aquatic monocots comprising both rooted**  
40 **and rootless genera. This has led to the idea that roots in these species may be vestigial, but**  
41 **empirical evidence supporting this is lacking. Here we show that duckweed roots are no longer**  
42 **required for their ancestral role of nutrient uptake. Comparative analyses of nearly all rooted**  
43 **duckweed species revealed a highly reduced anatomy, with greater simplification in the more**  
44 **recently diverged genus *Lemna*. A series of root excision experiments demonstrated that roots are**  
45 **dispensable for normal growth in *Spirodela polyrhiza* and *Lemna minor*. Furthermore, ionic**  
46 **analyses of fronds in these two species showed little difference in the elemental composition of**  
47 **plants in rooted versus root-excised samples. In comparison, another free-floating member of the**  
48 **Araceae, *Pistia stratiotes*, which colonized the aquatic environment independently of duckweeds,**  
49 **has retained a more complex root anatomy. Whilst *Pistia* roots were not absolutely required for**  
50 **growth, their removal inhibited plant growth and resulted in a broad change in the mineral profile**  
51 **of aerial tissues. Collectively, these observations suggest that duckweeds and *Pistia* may be**  
52 **different stages along a trajectory towards root vestigialization. Given this, along with the striking**  
53 **diversity of root phenotypes, culminating in total loss in the most derived species, we propose**  
54 **that duckweed roots are a powerful system with which to understand organ loss and vestigiality.**

55

56 **Introduction**

57 Evolution has shaped the body plans of all organisms into the myriad of diverse forms we see today.  
58 While evolution is commonly envisioned as constantly generating novel forms, things sometimes go  
59 the other way: occasionally, entire structures or traits are lost, becoming vestigial. This can result in  
60 radical shifts in body plan and life-history strategy and is a key evolutionary process driving  
61 structural innovation. Based on earlier definitions (Prout, 1964, Fong et al., 1995, Müller, 2002),  
62 vestigiality can be broadly defined as the retention, through evolution, of genetically determined  
63 structures that have lost some or all of their ancestral function.

64

65 Vestigiality is phylogenetically widespread in plants (Knobloch, 1951). Examples include loss of entire  
66 organs, such as floral organs in *Penstemon sp.*, oil glands in *Ceratandra* flowers, leaf reduction in  
67 *Equisetum*, and non-functional roots in dodder seedlings, and are often concurrent with atypical,  
68 innovative body plans or unusual life history strategies (Walker-Larsen and Harder, 2001; Sherman  
69 et al., 2008; Steiner, 1998). To date, reports exploring vestigiality in plants are largely descriptive.

70 Progress into understanding the molecular and evolutionary processes which drive organ loss in  
71 plants has therefore been limited.

72

73 The most advanced work driving our understanding of the molecular control of vestigiality comes  
74 from outside the plant kingdom. Perhaps the most detailed work has been done on the blind  
75 cavefish, *Astyanax mexicanus*, where the mechanisms underpinning eye-loss have been well  
76 described. Comparisons between blind and sighted cavefish has revealed that lens apoptosis is  
77 mediated by expansion of the expression domain of *sonic hedgehog A* and *B* (*shhA* and *sshB*), which  
78 negatively regulate the homeobox gene *pax6*, itself a key regulator of eye development in  
79 vertebrates (Yamamoto et al., 2004). It is clear from work in *Astyanax* that leveraging the presence  
80 and absence of organs in closely related species is crucial to gaining an understanding of vestigiality  
81 at a molecular level. We propose that root loss in duckweeds represents a powerful untapped model  
82 for understanding organ loss in plants due to the existence of closely related rooted and rootless  
83 species. Recent development of genetic tools (Yang et al., 2018; Vu et al., 2020; reviewed in Acosta  
84 et al., 2021) has enabled exploration of molecular networks in duckweeds. However, any study of  
85 vestigiality first requires a detailed understanding of how the organ in question functions. As roots  
86 are still retained in many duckweed species, we need clarity on duckweed root function to frame the  
87 evolutionary context of this model. Within the literature there are several observations regarding  
88 the function of duckweed roots; however there is no single study bringing together multiple lines of  
89 empirical evidence supporting their vestigiality.

90

91 Duckweeds are highly morphologically reduced free-floating angiosperms lacking many of the key  
92 organs common in flowering plants, such as clearly defined stems and leaves. The plant body is  
93 reduced to a flattened frond or thallus. They comprise five genera divided into two subgroups,  
94 Lemnoideae (*Spirodela*, *Landoltia* and *Lemna*) and Wolffioideae (*Wolffia* and *Wolffiella*). Within these  
95 genera, there is an evolutionary trajectory in root number consistent with root vestigialization: the  
96 earliest-diverging duckweed genera (*Spirodela* and *Landoltia*) possess multiple roots, later diverging  
97 ones a single root (*Lemna*), and the most recently diverging lineages possess no roots at all (*Wolffia*  
98 and *Wolffiella*) (Tippery and Les, 2020, Figure 1).

99

100 Duckweed roots are adventitious and neither branch nor form root hairs (Landolt, 1998). Previous  
101 studies have performed detailed investigations into root anatomy in individual species, reporting  
102 high levels of structural reduction. *Spirodela polyrhiza* roots have a stele comprising of one xylem  
103 cell, two sieve elements and between five and six phloem parenchyma cells (Kim, 2007). These are

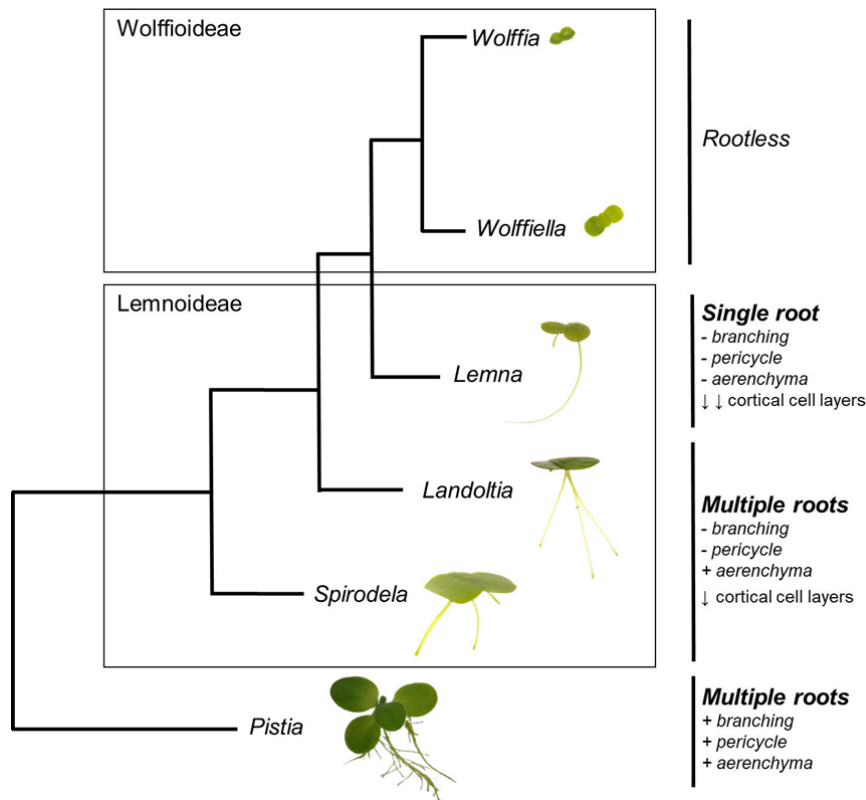

104 enclosed by a single layer of endodermis, three distinct cortical cell layers and between 38-45  
 105 epidermal cells (Kim, 2007). A similar pattern is reported for *Lemna minor* (Echlin, 1981). Although  
 106 there have been other studies of root anatomy (eg. Hegelmaier, 1868), we currently miss a  
 107 systematic understanding of root anatomy across the three root-bearing genera.

108

109 Vestigialization not only affects anatomy, but also function. It does not imply that organs should  
 110 possess no function, only that the salient function is lost. Here, we define the salient function of  
 111 roots as organs with which to acquire water and nutrients. Various lines of evidence have been  
 112 presented to support the view that duckweed roots have at most a limited role in nutrient uptake.  
 113 Hegelmaier (1868) noted that in their natural habitat, individuals of *Lemna gibba* without roots  
 114 occur. Gorham (1941) concluded that nutrients were taken up via fronds and not roots, as coating  
 115 the underside of fronds with a hydrophobic wax reduced the division rate of fronds and caused root  
 116 elongation, whilst coating the upper surface did neither. Muhonen and colleagues (1983) also noted  
 117 that *Spirodela polyrhiza* grew without roots. Whilst these studies suggest that roots may not be  
 118 required for growth, they do not rule out that duckweed roots still play some role in resource  
 119 capture. Indeed, it has been observed that both roots and fronds can assimilate nitrogen in both  
 120 *Lemna minor* and *Landoltia punctata* (Cedergreen and Madsen, 2002; Fang et al., 2007).

121

122 The above presents an incomplete picture of vestigiality in duckweed roots. To address this, we  
123 conducted a survey of duckweed root anatomy across almost all the rooted duckweed species. We  
124 examine to what extent changes in anatomy are consistent with roots being vestigial, and if  
125 additional structural reduction accompanies the reduction in root number between genera. We then  
126 investigated root function in two species by looking at growth and uptake of 13 elements in plants  
127 with and without roots excised. By comparing duckweeds with the related free-floating macrophyte  
128 *Pistia stratiotes* we present a scenario in which both anatomical complexity and the role of the root  
129 in foraging for nutrients has been progressively lost in duckweeds.

130

131

132 **Results**

133

134 **Duckweed root anatomy is highly reduced**

135

136 Previous reports of duckweed root anatomy focused on just a few species and have not directly  
137 compared these with relatives. Without outgroups, it is impossible to determine if there is a  
138 trajectory towards structural reduction in duckweeds. Previous phylogenetic studies have included  
139 *Pistia stratiotes* as an outgroup as another aquatic member of the *Araceae* (Les et al., 2002). *Pistia*  
140 and duckweeds share several morphological and ecological similarities as free-floating macrophytes  
141 but represent independent aroid lineages (Stockey et al., 1997, Wilde et al., 2005). Indeed, both  
142 fossil evidence (Stockey et al., 1997, Wilde et al., 2005) and phylogenetic analyses (Friis et al., 2004)  
143 suggest that duckweeds and *Pistia* independently colonized aquatic habitats, with fossils attributable  
144 to the duckweeds being much older than those attributable to *Pistia* (Cabrera et al., 2008). Thus,  
145 *Pistia* provides a useful model for understanding the highly reduced structure in duckweeds as its  
146 form resembles ancient fossil duckweeds such as *Limnobiophyllum*.

147

148 We surveyed macroscopic root structure for 20 duckweed lines, representing 13 species, with all  
149 *Spirodela* and *Landoltia* species represented and 10 of the 13 *Lemna* species, alongside *Pistia*  
150 *stratiotes*. Most species were represented by multiple accessions. In no instances were lateral roots  
151 or root hairs observed in duckweeds, in line with previous observations (Landolt, 1986). *Pistia* had a  
152 considerably larger and more complex root system with lateral roots. 11 out of 12 duckweeds have a  
153 mean root diameter between 120-200  $\mu\text{m}$ , with only *Lemna yungensis* falling outside of this range of  
154 means, possessing a mean diameter of 256  $\mu\text{m}$ . No duckweed species possessed a maximum root  
155 diameter close to the 325  $\mu\text{m}$  that we observed in *Pistia*. We counted an average of 212 total cells in  
156 *Pistia* cross-sections, while duckweeds display mean total cells values of 28-81 cells. *Spirodela* sp.  
157 displayed mean cross section cell numbers ranging from 40 to 81 cells. *Lemna* species typically  
158 displayed fewer cells in cross-section than *Spirodela*; mean values for all species are between 28 and  
159 45 cells, apart from *Lemna yungensis*, which displays 73. Morphological analysis of root patterning  
160 revealed a highly reduced anatomy common to all duckweed species. This consisted of a 3-5 of  
161 cortical cell layers and a highly reduced vasculature (Figure 2A). All the duckweed species possessed  
162 a single central xylem, typically surrounded by a small number (7-10) of what appear to be phloem  
163 parenchyma cells, although this identity has never been explicitly defined. *Pistia*, conversely, has  
164 multiple xylem files and considerably more phloem cells. It also has a discernible pericycle, which  
165 was absent in all duckweeds surveyed here (Figure 2A, Figure 3, Supplementary Figure 2).

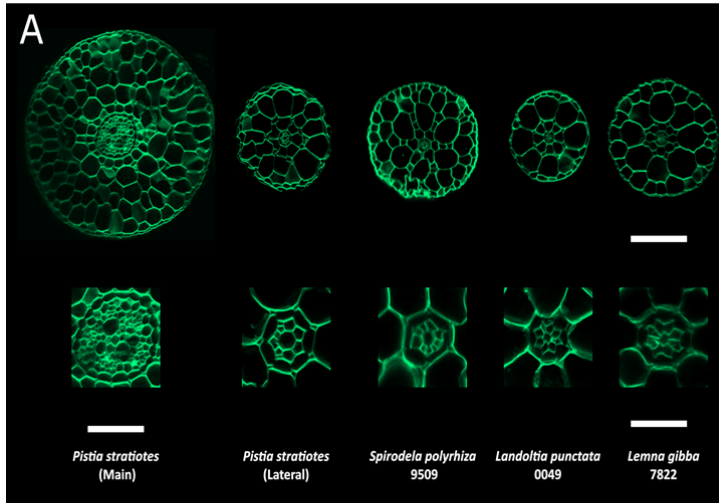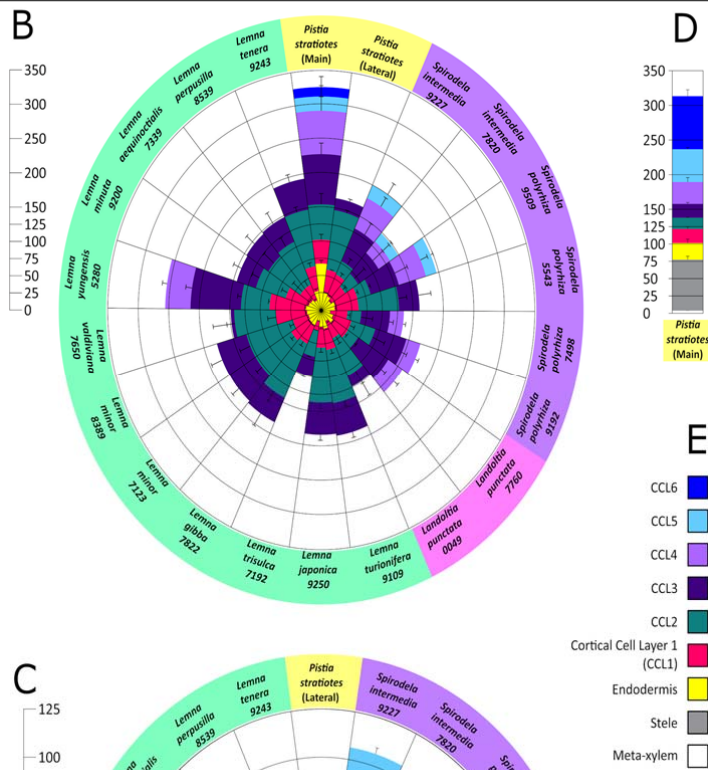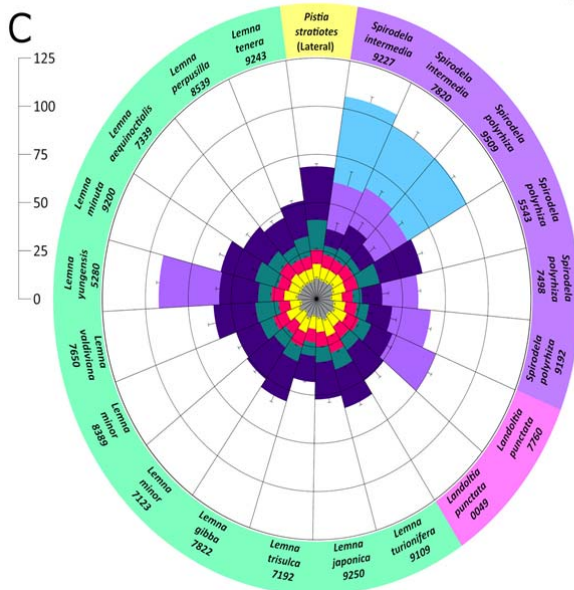

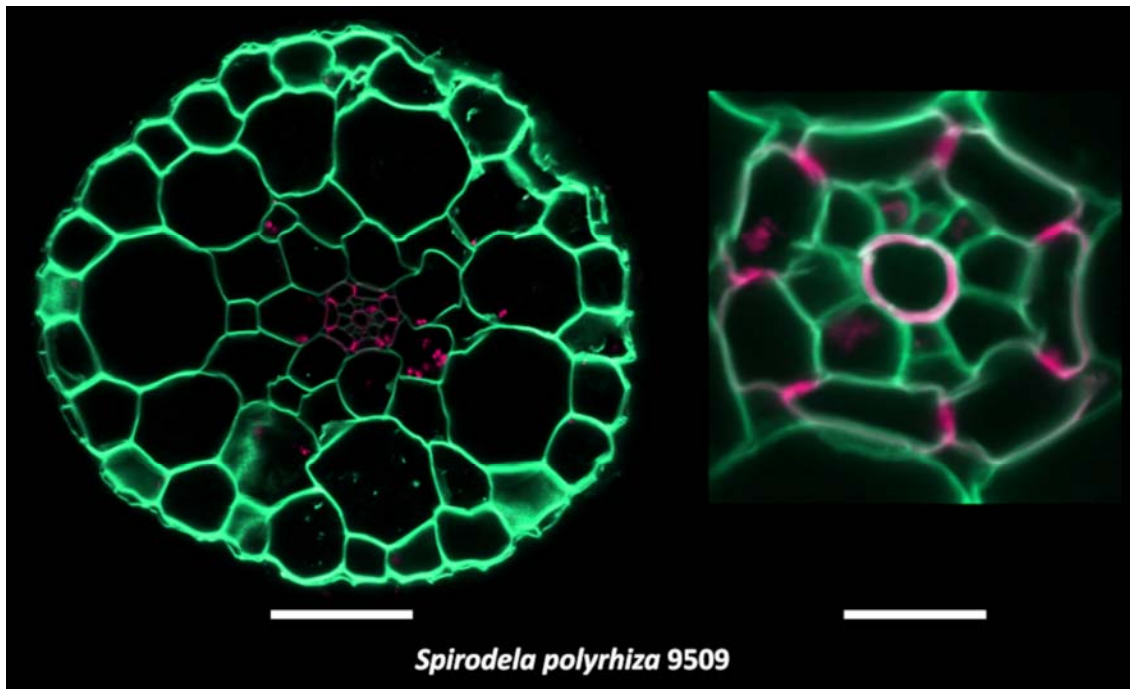

167 We observed a trend in the reduction of number of cortical cell layers (CCLs) from the earlier  
168 diverging *Spirodela* (3 of 6 accessions display 5 CCLs) to the later diverging *Lemna* (3 CCLs in 11 out  
169 of 12 accessions) (Figure 2B). This trend is not reflected in the root diameter (Figure 2C). Several  
170 duckweed species have large extracellular air spaces within the cortex, similar to the schizogenous  
171 aerenchyma found in many other aquatic plants (Jung et al., 2008). This feature appears more  
172 frequently in *Spirodela* (5 out of 6 lines), in 1 out of 2 of the *Landoltia* lines, and in only 2 out of 12  
173 closely related *Lemna* lines that are currently proposed to represent a single species (*yungensis*  
174 *valdiviana*) (Bog et al., 2020) (Figure 2A, Supplementary Figure 1).

175

176 Compared with *Pistia*, the cell number and size of the stele and endodermis is uniformly low across  
177 all duckweed species. The total number of cells enclosed by and including the endodermis is  
178 remarkably invariable across duckweed species, with all duckweed species falling within the range of  
179 16-18 cells, compared to approximately 100 in *Pistia*. The diameter of the endodermis is slightly  
180 more variable than cell number, with the mean for all species within a range of 15-28  $\mu\text{m}$ , with no  
181 clear pattern between genera. The fact that duckweeds consistently showed reduced cell size and  
182 number within the stele suggests reduced importance for transport within the root, consistent with  
183 vestigiality.

184

185 We quantified a number of parameters relating to number and size of each cell type in the root and  
186 conducted a principal coordinates analysis to survey the general trends in this anatomical dataset  
187 (Figure 4). Each point represents the data captured from a root section of a separate individual



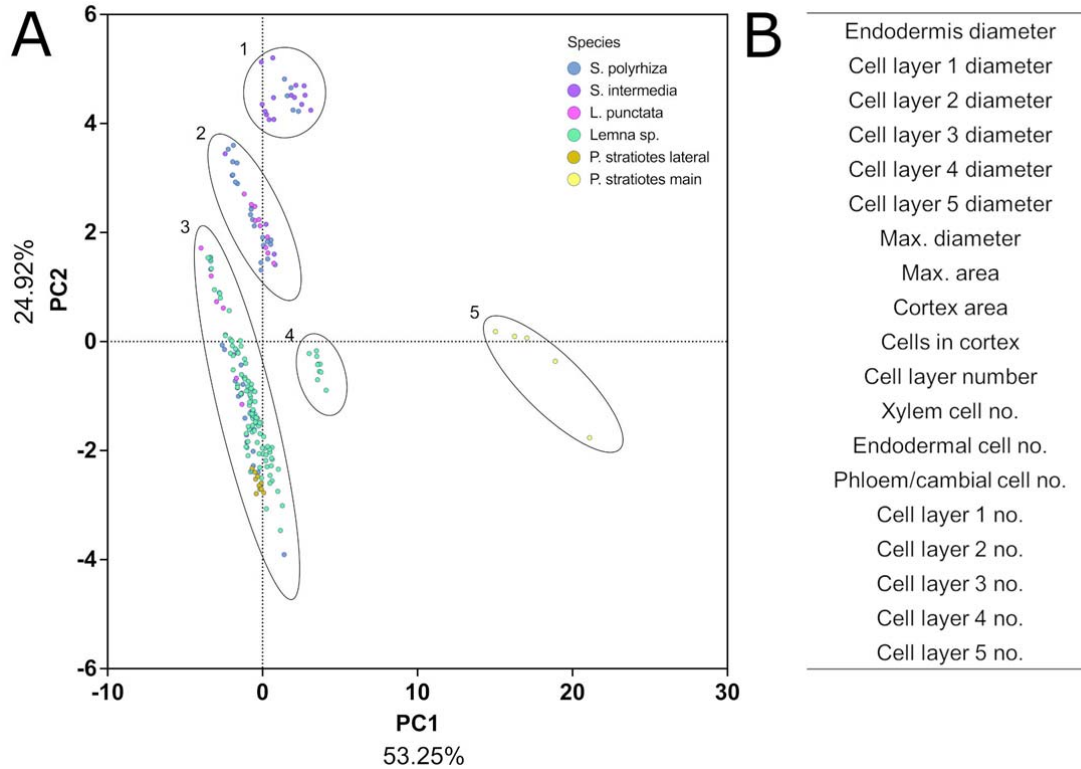

188 (Figure 4A), and the 19 variables are shown in (Figure 4B). The PCoA displays 5 distinct clusters,  
 189 consistent with phylogenetic groupings. All *Lemna* species are retained in a single cluster (3), apart  
 190 from *Lemna yungensis*, which forms a distinct unique cluster outside of the larger *Lemna* cluster  
 191 containing this species alone (4). *Spirodela intermedia* occurs in two distinct clusters (1 and 2),  
 192 neither of which contain any *Lemna* individuals. The majority of *Spirodela intermedia* individuals  
 193 cluster together, in a group also consisting of a small number of *Spirodela polyrhiza* samples (cluster  
 194 2). *Spirodela polyrhiza* is distributed more broadly and located within clusters 1, 2 and 3, with the  
 195 majority of individuals falling into cluster 2, which contains only *Spirodela* and *Landoltia* species. A  
 196 small number of *Spirodela polyrhiza* samples also fall into the *Lemna* cluster. *Landoltia* primarily co-  
 197 occurs with *Spirodela polyrhiza* and *intermedia* in cluster 2, and a few individuals occur in the *Lemna*  
 198 cluster. *Pistia* main roots group distant from all duckweeds driving the main axis, PC1. Interestingly,  
 199 all *Pistia* lateral roots fall within the *Lemna* cluster. Given that the duckweed genera broadly cluster  
 200 within their own groups, and that we see a reduction in root complexity (CCLs & aerenchyma) from  
 201 *Spirodela* to *Lemna*, we propose that root anatomy is progressively reduced in more recently derived  
 202 duckweed lineages.

203

204 **Continuous root removal does not reduce duckweed growth, but does reduce growth in *Pistia***  
 205 ***stratiotes*.**

206

207 We hypothesised that a reduction in root complexity would be reflected by reduced requirement of  
208 roots for plant growth. To test this hypothesis, we conducted root removal experiments and  
209 compared the growth rate response to root removal in two representative duckweed species,  
210 *Lemna minor* and *Spirodela polyrhiza*, alongside *Pistia stratiotes*. Root removal was conducted daily  
211 for a period of 11 days to minimise growth of new root material. Growth (as frond or aerial tissue  
212 area) was measured daily, normalised as a percent of the initial area value (Figure 5). During the  
213 growth series, we observed an approximate 12 fold increase in frond area for *Lemna minor*, a 10 fold  
214 increase for *Spirodela polyrhiza*, and an 8 fold increase in area for *Pistia stratiotes* for individuals in  
215 control samples where roots were intact (Figure 5). For *Spirodela polyrhiza* (Figure 5A) we saw no  
216 significant difference in growth for rooted versus root-excised samples. In *Lemna minor*, the only  
217 significant differences in growth arose on the final three days of the growth series, where plants  
218 with their roots removed displayed enhanced growth (Figure 5B). In contrast, root removal markedly  
219 reduced the growth rate of *Pistia stratiotes* (Figure 5C). These results indicate that duckweed roots  
220 are not required to sustain growth in laboratory conditions. These results also suggest that the root  
221 is not an essential means of water absorption in duckweed.

222

223 **Root removal does not impair the ability of *Lemna minor* or *Spirodela polyrhiza* to absorb macro-**  
224 **and micronutrients, but does impact nutrient uptake in *Pistia stratiotes*.**

225

226 The growth rate assay established that rooted versus root-excised duckweeds grew in a similar  
227 manner, but root removal impeded the growth of *Pistia stratoites*. We reasoned that if roots were  
228 required for the uptake of specific elements, assays in which we measure specific elements would be  
229 more sensitive than a crude measurement of growth in detecting the extent to which roots are still  
230 required for their ancestral function. To investigate this, we subjected the fronds and aerial tissues  
231 of *Pistia* generated by the previous experiment to an ionomic analysis. A total of 16 elements were  
232 successfully detected in these species. Whilst some rare elements such as Li and Cd were detected,  
233 we only considered 13 elements present in our growth media B, Na, Mg, P, S, K, Ca, Fe, Mn, Co, Cu,  
234 Zn and Mo (supplementary figure 2). As our analysis was run under atmospheric conditions, we were  
235 unable to measure the levels of N.

236

237 Root removal in duckweed made little change to the overall accumulation of nutrients in duckweed  
238 (Figure 6A, B). Between *Lemna minor* and *Spirodela polyrhiza*, there were five instances where root  
239 removal significantly altered elemental concentration in the frond. In three instances, root removal  
240 resulted in a significantly up-regulated accumulation of certain elements: we saw increased Ca

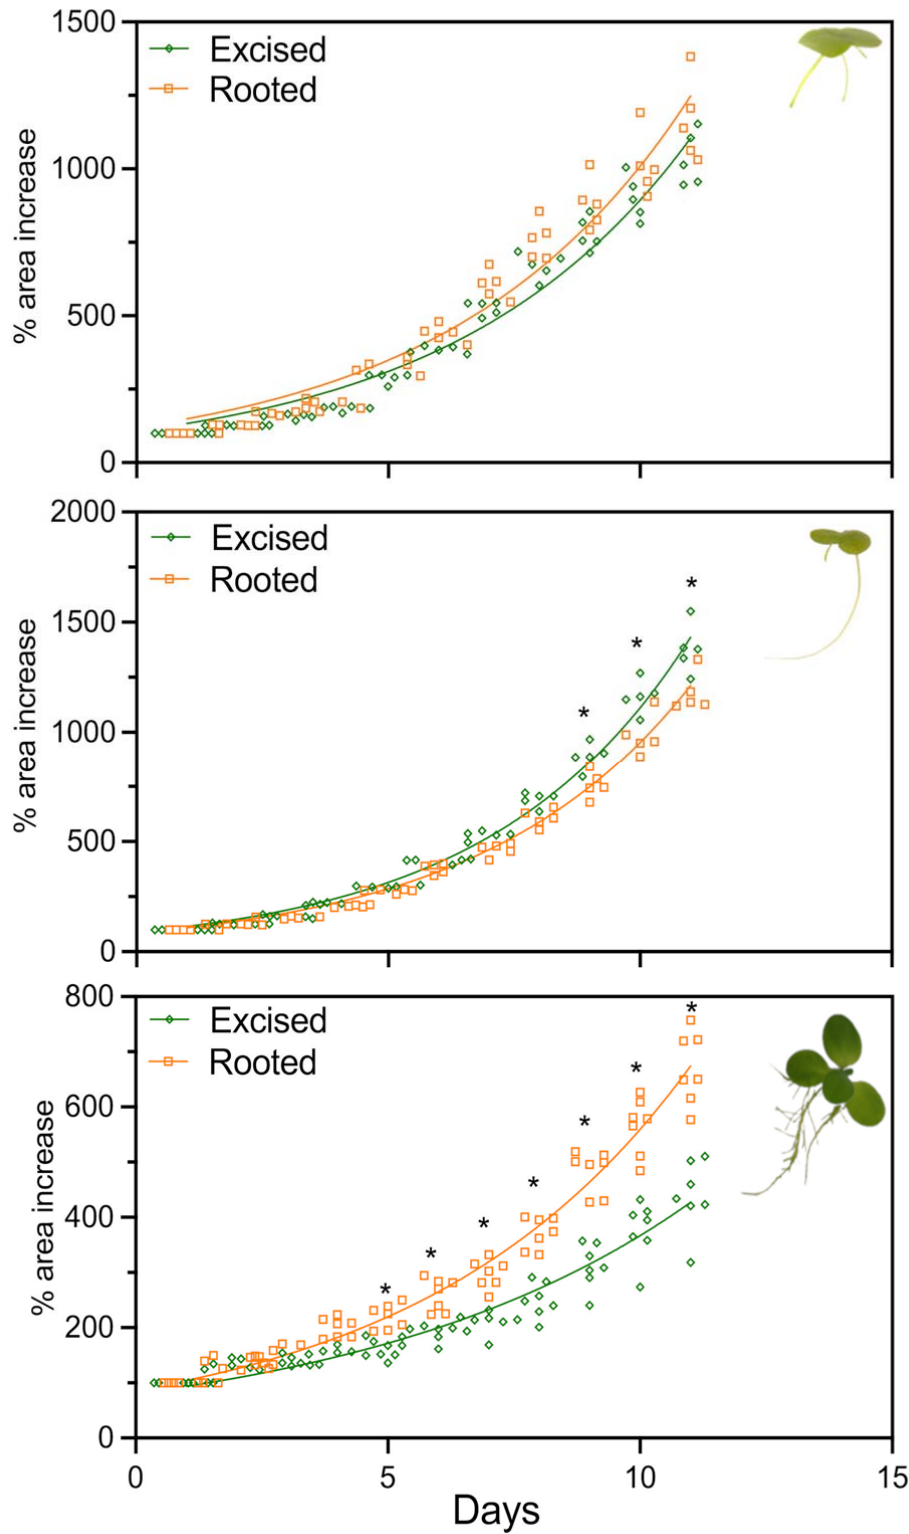

241 concentration in the fronds of both *L. minor* and *S. polyrhiza*, and increased Fe, Zn and Mn in *S.*  
242 *polyrhiza* alone. Root removal resulted in a reduction in concentration of B and Cu in *L. minor* alone

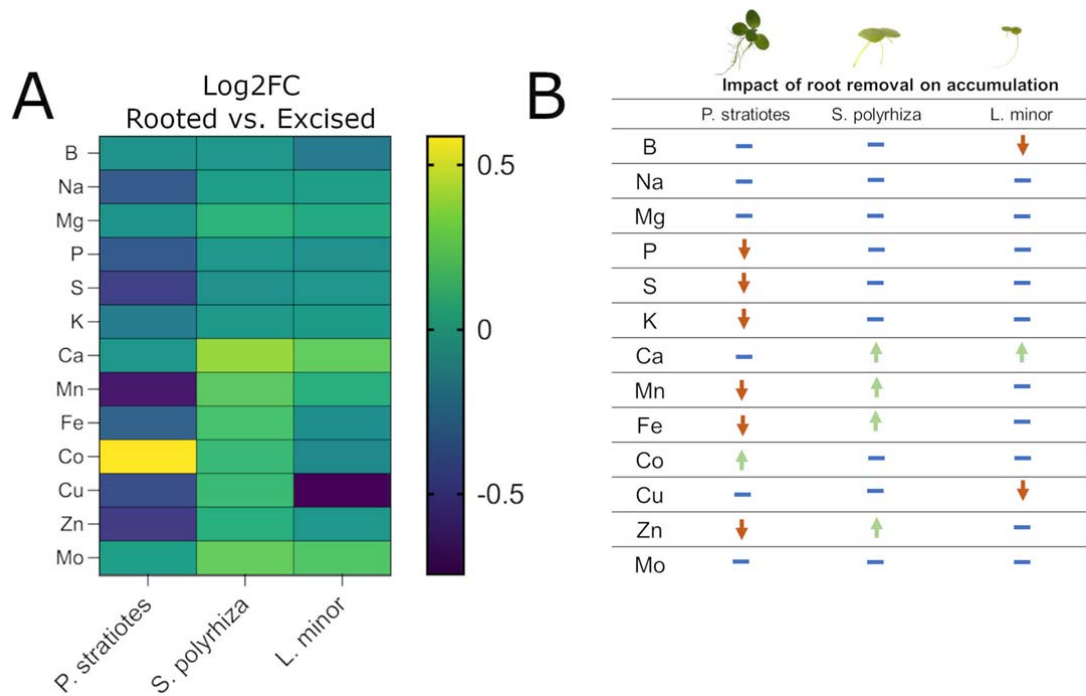

243 (Figure 6A, B, Supplementary Figure 2). In contrast, the impact of root removal on the ionic  
 244 composition of *Pistia* was considerably greater, with P, S, K, Fe, Mn and Zn all being significantly  
 245 reduced (Figure 6B, Supplementary Figure 2). Together, these data suggest that whilst roots are no  
 246 longer required for growth and nutrient uptake in duckweeds, *Pistia* roots still play an important role  
 247 in growth and nutrient acquisition. However, given that they are not absolutely required for growth,  
 248 it may be that *Pistia* is *en route* to root vestigiality, albeit at a less advanced stage than the  
 249 duckweeds.

250

251

252 **Discussion**

253

254 Here we sought to better resolve whether the duckweed root may be a vestigial organ, with the aim  
255 of clarifying if duckweeds may serve as a helpful model for understanding the molecular  
256 mechanisms underpinning organ loss. For an organ to be considered vestigial, it must have lost its  
257 salient function. Typically, such organs undergo accompanying reductions in size and complexity.  
258 Defining salient functions for an individual organ is challenging. However, it is clear that for almost  
259 all angiosperms, a primary function of roots is to supply water and nutrients to the growing plant,  
260 sustaining growth of the aboveground tissues (Boyce, 2005). We therefore examined the anatomy,  
261 as well as water and nutrient uptake ability, of duckweed roots to better ascertain the position of  
262 each species group along a trajectory towards vestigiality, culminating in root loss in the most  
263 recently evolved *Wolffia* and *Wolffiella* (Fig. 1).

264

265 We began by surveying the anatomy of a global collection of specimens including almost all rooted  
266 duckweeds, allowing us to observe if a) the reduced anatomy in duckweeds is consistent between  
267 species and genera and b) if any trends in root reduction are present at the anatomical level. This  
268 built upon previous reports looking into a handful of species (An et al., 2019; Landolt, 1986;  
269 Melaragno and Walsh, 1976), expanding it considerably to encompass almost all rooted species of  
270 duckweeds. We compared duckweed root morphology with the sister *Pistia stratoites*, which is  
271 believed to have undergone an independent and more recent invasion of the aquatic environment.  
272 Our findings revealed that duckweed roots are consistently reduced in both size (diameter) and  
273 morphological complexity compared with *Pistia*, consistent with the idea that they are no longer  
274 required for active nutrient transport (Figure 2A, Supplementary Figure 2).

275

276 As well as the macroscopic reduction in root system complexity - multiple roots per frond to single  
277 root per frond - in *Spirodela* and *Landoltia* versus *Lemna*, we also leveraged our anatomical data to  
278 question whether root anatomical complexity reduces concurrently with root number. We observed  
279 a reduction in both the number of cortical cell layers and the presence of aerenchyma between  
280 *Spirodela* spp. and *Lemna* spp. The apparent decrease in complexity between *Spirodela* spp. and  
281 *Lemna* spp. supports a model in which traits associated with root complexity have been  
282 progressively lost in duckweeds as novel species have formed, accompanying the reduction in root  
283 number. In comparison, *Pistia* plants may be less far along this trajectory towards root  
284 vestigialization. A PCoA encompassing all root anatomical traits measured further confirmed these  
285 observations. Virtually all individuals of the genera *Spirodela* and *Landoltia* sit in two distinct clusters

286 based on their root anatomy, separated from *Lemna* individuals, which exist almost exclusively in a  
287 single cluster, matching their monophyletic origin. This correlation with phylogenetic groupings  
288 further supports the concept that root anatomy has evolved to become further reduced in *Lemna*.  
289 We feel root loss in duckweed presents a unique opportunity for deepening our understanding of  
290 vestigiality. In other models of organ loss, such as cavefish, evolution has produced a more binary  
291 range of traits (i.e. sighted versus unsighted fish). In comparison the duckweed root offers a greater  
292 spectrum of phenotypes in terms of both root number and anatomy, providing a rich pool of  
293 germplasm within which we can explore networks controlling discrete aspects of root development.

294

295 The anatomy of the duckweed root is also highly similar to that of lateral roots in *Pistia*. This cellular  
296 arrangement is similar to that of fine lateral roots of other monocot species (Watanabe et al., 2020).  
297 When root anatomical trait values are mapped onto a PCoA, *Pistia* lateral roots sit in a cluster which  
298 is primarily composed of *Lemna spp.* It is feasible that this cellular arrangement seen in *Lemna*  
299 represents or is approaching an anatomical ‘minimum’ without which it would not be possible to  
300 form a root.

301

302 If duckweed roots are vestigial, they should not only have reduced complexity but will have lost  
303 some or all of their salient function. We showed that whilst *Pistia* roots had a positive and significant  
304 effect on leaf growth, growth of duckweed fronds was largely unaffected in rooted versus rootless  
305 samples, implying that roots are dispensable for providing nutrients and water for growth. Growth  
306 data alone do not provide a full picture of capacity for nutrient transport. We therefore leveraged an  
307 ionomics platform that permitted a survey of the elemental landscape of duckweed fronds when  
308 grown without a root, which we compared with *Pistia stratiotes*. We considered a broad suite of  
309 nutrients including every element present in our growth media, except nitrogen. We did not see  
310 major shifts in the elemental composition of the fronds of either duckweed species when subjected  
311 to continuous root removal. Strikingly, no elements included in our analysis (0 out of 13) exhibited  
312 reduced accumulation in *Spirodela polyrhiza* grown without roots, and only 2 out of 13, B and Cu,  
313 did in *Lemna minor*. Conversely, in *Pistia stratiotes*, 6 of the 13 elements quantified exhibited  
314 reduced accumulation in shoot tissues as a consequence of root removal, including elements critical  
315 for growth with well-established root-mediated uptake mechanisms such as P and K. Together, this  
316 clearly evidences the dispensability of roots in duckweeds for nutrient uptake. A surprising result in  
317 both *Spirodela* and *Lemna* was the increase in certain nutrients following root excision. This included  
318 Ca, Fe, Zn, and Mn, with Ca being consistently elevated. A potential hypothesis is that duckweed  
319 roots could be repurposed for the storage or sequestration of nutrients. Raphides (calcium oxalate

320 crystals) are present in *Lemna minor* and have been shown to localise within roots (Franceschi 1987,  
321 1989).

322

323 Considering the definitions of vestigiality by both Prout and Muller, we feel that these data clarify  
324 that duckweed roots are indeed vestigial, and to varying degrees across the group, opening the door  
325 to their utilisation as models for understanding this vestigiality. This gradient also poses a key  
326 question. If duckweed roots are vestigial, why are they maintained in some species? Whilst some  
327 vestigial structures may be non-functional, others may have gained novel functions as a  
328 consequence of reduced constraint (i.e., exaptation), whilst other structures may be in an  
329 intermediate state whereby the transition to vestigiality is incomplete (Walker-Larsen and Harder,  
330 2001). It is therefore possible that relaxed selection pressure has permitted duckweed roots to  
331 become neofunctionalised to perform novel roles. It has been suggested that duckweed roots may  
332 function as organs of stability (Landolt, 1986) or aid dispersal by adhering to animals (Cross, 2017).

333

334 In conclusion, these results support a model of progressive vestigiality of roots across the  
335 duckweeds. Broadly it points to a duckweed root that is both anatomically simplified and  
336 dispensable for the salient functions of water or nutrient uptake. However, we acknowledge that  
337 our experiments do not completely rule out a role for root in nutrient uptake under, for example,  
338 limiting conditions or in natural habitats, replete with companion species and competitors. However,  
339 these results lay a foundation for the use of duckweed roots as a model system for further  
340 investigation into the molecular and evolutionary processes underlying vestigiality in plants.

341

342

343 **Methods**

344

345 **Duckweed growth and culture**

346

347 All duckweed stocks employed in this experiment were obtained from the Landolt collection, ETH  
348 Zurich (<http://www.duckweed.ch>), except for Spirodela polyrhiza lines 9509 and 7948 which were  
349 provided by Klaus Appenroth, Friedrich Schiller University, Jena. Four-digit numerical codes following  
350 species names refer to their Landolt accession number. Stocks were maintained on liquid N-media or  
351 SH-media (Appenroth et al., 1996) at 120  $\mu\text{mol m}^{-2} \text{s}^{-1}$  light and 16/8h light cycle in a Conviron  
352 growth chamber, set to 22°C with 70% RH. *Pistia stratiotes* was obtained from JAM Aquatics,  
353 Wrexham, UK.

354

355 **Root cross section anatomy**

356

357 Plants were grown in 250 ml conical flasks containing 150 ml of liquid N-media in the same  
358 conditions as stocks. Flasks were inoculated with 5-10 colonies from the stock collections and grown  
359 for 2-6 weeks. Plants selected possessed roots of average or greater length, and fronds of average or  
360 greater area based on visual appraisal.

361

362 Vibratome sectioning of duckweed roots was conducted as per Jones et al., (2021). For each line, ten  
363 individual plants per line were embedded and sectioned, and 5-10 root sections were collected per  
364 plant, stained using the method described in Atkinson and Wells (2017), and imaged using confocal  
365 laser scanning microscopy. Basic fuchsin staining was conducted at a concentration of 0.01%  
366 following sectioning. A single image section per plant was selected based on quality and  
367 representation, then measured using FIJI (Schindelin et al., 2012). Cells were classified into layers in  
368 concentric rings from the endodermis outwards. The diameter of each layer was measured, as was  
369 the number of cells in each layer, along with the diameter of the endodermis, number of  
370 endodermal cells, and number of cells in the stele. Diameters were measured using the ruler tool. At  
371 each layer, diameter was measured from 5 points around the circumference of the layer, measuring  
372 the maximum distance between points on the layer, then the mean was taken of these 5 points for  
373 each layer. Epidermal cells had poor dye penetration, and a reduced fluorescence on the confocal  
374 microscope, and so could not be reliably counted.

375

376 **Root removal treatments and imaging**



377

378 For the root removal experiment, plants were grown in Schenck-Hildebrandt (SH) media. For the  
379 control treatment, no manipulation was undertaken. In the root removal treatment, all visible roots  
380 were removed from colonies daily using ethanol sterilised surgical scissors. For *Spirodela polyrhiza*  
381 and *Lemna minor*, each treatment consisted of five individual flasks, each seeded with 3 colonies  
382 onto 100 ml of media. Individual flasks were treated as a replicate and flasks were arranged  
383 randomly in the growth cabinet and re-randomized daily. For *Pistia stratiotes*, each flask was seeded  
384 with a young individual plant with 3 emerged leaves visible to the naked eye, to a total of 7  
385 plants/treatment. The treatment regimen was conducted for 11 consecutive days.

386

387 Plants were imaged daily in their flasks from beneath, utilising a transparent raised platform  
388 featuring a water bath in which to place the flasks to correct for the optical distortion. Images were  
389 processed using FIJI to measure frond or aerial tissue area. For duckweed flasks, RGB images were  
390 split into their constitutive 8-bit channels, and the blue channel retained. Frond tissues alone were  
391 then selected using the threshold tool and area measured. For *Pistia*, images were again split, but  
392 the red channel retained. This was then subject to gaussian blur (sigma = 7.0) and again only the  
393 aerial tissues selected using the threshold tool. In rooted samples where this alone was not  
394 sufficient to separate frond and root, the select polygons tool was used to exclude any additional  
395 root captured by thresholding.

396

### 397 **Ionic analysis**

398

399 Samples were harvested immediately following the root removal experiment. Prior to harvesting,  
400 roots were removed from fronds or aerial tissues and washed 3 times for 2 minutes with MilliQ  
401 water. Samples were placed in pre-weighed Pyrex test tubes, and dried at 88°C for 24h. Then, dry  
402 weight was recorded, and 1 ml concentrated trace metal grade nitric acid Primar Plus (Fisher  
403 Chemicals) spiked with in internal standard was added to the samples that were further digested in  
404 DigiPREP MS dry block heaters (SCP Science; QMX Laboratories) for 4 hours at 115°C following the  
405 method adapted from Danku et al.,2013. After digestion, samples were diluted to 10 mL with 18.2  
406 MΩcm Milli-Q Direct water and elemental analysis was performed using an ICP-MS, PerkinElmer  
407 NexION 2000 and twenty-three elements were monitored (Li, B, Na, Mg, P, S, K, Ca, Ti, Cr, Mn, Fe,  
408 Co, Ni, Cu, Zn, As, Se, Rb, Sr, Mo, Cd and Pb). To correct for variation within ICP-MS analysis run,  
409 liquid reference material was prepared using pooled digested samples, and run after every nine  
410 samples. Sample concentrations were calculated using external calibration method within the

411 instrument software. Further data processing including calculation of final elements concentrations  
412 was performed in Microsoft Excel.

413

#### 414 **Statistical analyses**

415

416 All statistical analyses were conducted in GraphPad Prism version 9.0 (graphpad.com). For the  
417 anatomical dataset, principal coordinates analysis was conducted on 19 variables and 210 rows  
418 utilising parallel analysis with 1000 simulations and a random seed. For root removal experiments,  
419 two-way repeated measures ANOVA was performed, followed with Sidaks' multiple comparisons  
420 test to establish differences in growth on a per-day basis. For nutrient concentration comparisons  
421 generated by ionomic analyses, data were compared with one-way ANOVA followed by Sidak's  
422 multiple comparison's test to establish differences in concentration between individual nutrients.  
423 Log<sub>2</sub> fold changes generated from ionomic data were calculated as Log<sub>2</sub>(elemental conc. roots  
424 removed)-Log<sub>2</sub>(elemental conc. rooted).

425

#### 426 **Figure legends**

427

428 Figure 1. Representative phylogeny of the duckweed genera and *Pistia* highlighting the progressive  
429 loss of roots of roots and loss of individual root traits as genera diverge (indicated by + and -; arrows  
430 next to cortical cell layers indicate the progressive reduction in layer number as the genera diverge)  
431 (after Tippery and Les, 2020). Representative images (not to scale) of species from each genera are  
432 shown for illustrative purposes.

433

434 Figure 2. Comparison of root anatomical traits across almost all extant duckweeds reveals a highly  
435 reduced anatomy. A) Representative images of root sections from species representing each  
436 duckweed genera and main and lateral roots of *Pistia stratiotes*. Images were obtained via fresh  
437 tissue sectioning and confocal imaging. Scale bar = 50  $\mu$ M for entire roots; 10  $\mu$ M for vasculature  
438 close-up. B) Rose diagram displaying the width of each cell layer ( $\mu$ m) for roots of 20 duckweed lines  
439 encompassing 13 species, denoted at the outside of the circle. C) Rose diagram displaying the  
440 number of cells in cell layer for roots of the aforementioned lines, denoted at the outside of the  
441 circle, with *P. stratiotes* main roots (D) in a separate bar chart for ease of resolution. Background  
442 colour underlying the species labels represents genera; yellow represents *Pistia*, purple *Spirodela*,  
443 pink *Landoltia*, green *Lemna*. E) Colour coded key to the different cell layers displayed on the rose

444 diagrams. CCL stands for cortical cell layer.  $n = 10$  root sections derived from different plants, except  
445 for *Pistia stratiotes* (main) and *L. trisulca* where  $n = 5$  root sections derived from individual plants.

446

447 Figure 3. Basic fuchsin staining of duckweed vasculature highlights lignification in the endodermis  
448 and central xylem. Entire root section and accompanying close up of the vasculature of *Spirodela*  
449 *polyrhiza* 9509 with cell wall staining (calcofluor white; green) and lignin staining (0.01% Basic  
450 Fuchsin; magenta). Scale bar = 50  $\mu\text{M}$  for entire roots; 10  $\mu\text{M}$  for vasculature close-up.

451

452 Figure 4. Principal coordinates analysis of duckweed anatomical traits highlights interspecies  
453 differences and a gradient of reducing root anatomical complexity. A) PCoA based on 21  
454 components, with 210 rows, derived from an anatomical analysis of fresh root sections from 20  
455 duckweed lines, encompassing 13 species, and main and lateral roots of *Pistia stratiotes*. Clusters  
456 have been manually highlighted and numbered for ease of further discussion. Percentage of  
457 variance explained by each PC is indicated on the relevant axis. B) Summary of the 19 variables used  
458 to generate the PCoA in A.

459

460 Figure 5. Growth of the duckweeds *Spirodela polyrhiza* and *Lemna minor* is not impacted by  
461 continual root removal, unlike the aroid *Pistia stratiotes*. Plants were subjected to continuous root  
462 removal and growth compared to untreated controls. Growth was measured as area of fronds (or  
463 aerial tissues for *Pistia*), derived from daily imaging from beneath, and plotted as a percentage  
464 increase relative to the initial (day 1) area value. Lines show the best fit of an exponential growth  
465 curve. A) *Spirodela polyrhiza*; B) *Lemna minor*; C) *Pistia stratiotes*.  $n = 5$  flasks, each initially seeded  
466 with 3 colonies for duckweeds;  $n = 7$  flasks, each initially seeded with 1 plant for *Pistia*. Asterisks  
467 show statistically significant differences as assessed by two-way repeated measures ANOVA  
468 followed by Sidak's multiple comparisons. Lines show the best fit of an exponential (Malthusian)  
469 growth curve.

470

471 Figure 6. Continuous root removal has a limited effect on element accumulation on the duckweeds  
472 *Spirodela polyrhiza* and *Lemna minor* but reduces the accumulation of a number of elements in the  
473 aroid *Pistia stratiotes*. A) Heatmap showing the log<sub>2</sub> fold change of rooted versus rooted elements  
474 for each species. B) Table synthesising the data generated in A) indicating whether root removal  
475 results in statistically significant increased accumulation (green upwards arrow), decreased  
476 accumulation (red downwards arrow), or no significant change (blue hyphen). Significance ( $P < 0.05$ )  
477 was determined by one-way ANOVA followed by Sidak's multiple comparisons test.  $n = 5$  flasks, each

478 initially seeded with 3 colonies for duckweeds;  $n = 7$  flasks, each initially seeded with 1 plant for

479 *Pistia*.

480

481

## Parsed Citations

**Acosta, K., Appenroth, K., Borisjuk, L., Edelman, M., Heinig, U., Jansen, M., Oyama, T., Pasaribu, B., Schubert, I., Sorrels, S., Sree, K., Xu, S., Michael, T. and Lam, E., 2021. Return of the Lemnaceae: duckweed as a model plant system in the genomics and postgenomics era. *The Plant Cell*, 33(10), pp.3207-3234**

Google Scholar: [Author Only](#) [Title Only](#) [Author and Title](#)

**An, D., Zhou, Y., Li, C., Xiao, Q., Wang, T., Zhang, Y., Wu, Y., Li, Y., Chao, D.Y., Messing, J. and Wang, W., 2019. Plant evolution and environmental adaptation unveiled by long-read whole-genome sequencing of Spirodela. *Proceedings of the National Academy of Sciences*, 116(38), pp.18893-18899.**

Google Scholar: [Author Only](#) [Title Only](#) [Author and Title](#)

**Atkinson, J.A. and Wells, D.M., 2017. An updated protocol for high throughput plant tissue sectioning. *Frontiers in plant science*, 8, p.1721.**

Google Scholar: [Author Only](#) [Title Only](#) [Author and Title](#)

**Boyce, C.K., 2005. The evolutionary history of roots and leaves. In *Vascular transport in plants* (pp. 479-499). Academic Press.**

Google Scholar: [Author Only](#) [Title Only](#) [Author and Title](#)

**Bog, M., Sree, K.S., Fuchs, J., Hoang, P.T., Schubert, I., Kuever, J., Rabenstein, A., Paolacci, S., Jansen, M.A. and Appenroth, K.J., 2020. A taxonomic revision of Lemna sect. Uninerves (Lemnaceae). *Taxon*, 69(1), pp.56-66.**

Google Scholar: [Author Only](#) [Title Only](#) [Author and Title](#)

**Cabrera, L.I., Salazar, G.A., Chase, M.W., Mayo, S.J., Bogner, J. and Dávila, P., 2008. Phylogenetic relationships of aroids and duckweeds (Araceae) inferred from coding and noncoding plastid DNA. *American Journal of Botany*, 95(9), pp.1153-1165.**

Google Scholar: [Author Only](#) [Title Only](#) [Author and Title](#)

**Cedergreen, N. and Madsen, T.V., 2002. Nitrogen uptake by the floating macrophyte Lemna minor. *New phytologist*, 155(2), pp.285-292.**

Google Scholar: [Author Only](#) [Title Only](#) [Author and Title](#)

**Cross, 2017. Duckweed Roots: their role in vegetative dispersal. *Duckweed Forum*, 5(3), pp. 58-59**

Google Scholar: [Author Only](#) [Title Only](#) [Author and Title](#)

**Echlin, P., Lai, C. and Hayes, T.L., 1981. The distribution and relative concentration of potassium in the root-tips of Lemna minor L. analysed by low-temperature X-ray microanalysis. *Scanning Electron Microscope (USA)*, pp. 489-498.**

Google Scholar: [Author Only](#) [Title Only](#) [Author and Title](#)

**Fang, Y.Y., Babourina, O., Rengel, Z., Yang, X.E. and Pu, P.M., 2007. Ammonium and nitrate uptake by the floating plant Landoltia punctata. *Annals of botany*, 99(2), pp.365-370.**

Google Scholar: [Author Only](#) [Title Only](#) [Author and Title](#)

**Fong, D., Kane, T. and Culver, D., 1995. Vestigialization and Loss of Nonfunctional Characters. *Annual Review of Ecology and Systematics*, 26(1), pp.249-268.**

Google Scholar: [Author Only](#) [Title Only](#) [Author and Title](#)

**Friis, E.M., Pedersen, K.R. and Crane, P.R., 2004. Araceae from the Early Cretaceous of Portugal: evidence on the emergence of monocotyledons. *Proceedings of the National Academy of Sciences*, 101(47), pp.16565-16570.**

Google Scholar: [Author Only](#) [Title Only](#) [Author and Title](#)

**Franceschi, V.R., 1989. Calcium oxalate formation is a rapid and reversible process in Lemna minor L. *Protoplasma*, 148(2), pp.130-137.**

Google Scholar: [Author Only](#) [Title Only](#) [Author and Title](#)

**Franceschi, V.R., 1987. Oxalic acid metabolism and calcium oxalate formation in Lemna minor L. *Plant, Cell & Environment*, 10(5), pp.397-406.**

Google Scholar: [Author Only](#) [Title Only](#) [Author and Title](#)

**Gorham, P.R., 1941. Measurement of the response of Lemna to growth promoting substances. *American Journal of Botany*, pp.98-101.**

Google Scholar: [Author Only](#) [Title Only](#) [Author and Title](#)

**Hegelmaier, F 1868. Die Lemnaceen – eine monographische Untersuchung. 169 pp. XVI plates. Wilhelm Engelmann, Leipzig.**

Google Scholar: [Author Only](#) [Title Only](#) [Author and Title](#)

**Jung, J., Lee, S.C. and Choi, H.K., 2008. Anatomical patterns of aerenchyma in aquatic and wetland plants. *Journal of Plant Biology*, 51(6), pp.428-439.**

Google Scholar: [Author Only](#) [Title Only](#) [Author and Title](#)

**Kim, I., 2007. Development of the root system in Spirodela polyrhiza (L.) Schleiden (Lemnaceae). *Journal of Plant Biology*, 50(5),**

pp.540-547.

Google Scholar: [Author Only](#) [Title Only](#) [Author and Title](#)

**Knobloch, I., 1951. Are There Vestigial Structures in Plants?. Science, 113(2938), pp.465-465.**

**Landolt, E., 1998. Anatomy of the Lemnaceae (duckweeds), In Extreme Adaptations in Angiospermous Hydrophytes. (pp. 1-127.). Borntraeger, Berlin.**

Google Scholar: [Author Only](#) [Title Only](#) [Author and Title](#)

**Landolt, E. 1986. The family of Lemnaceae - a monographic study, Vol 1.. Veroff. Geobot. Inst. ETH, Stiftung Rubel. No. 71.**

Google Scholar: [Author Only](#) [Title Only](#) [Author and Title](#)

**Les, D.H., Crawford, D.J., Landolt, E., Gabel, J.D. and Kimball, R.T., 2002. Phylogeny and systematics of Lemnaceae, the duckweed family. Systematic Botany, 27(2), pp.221-240.**

Google Scholar: [Author Only](#) [Title Only](#) [Author and Title](#)

**Melaragno, J.E. and Walsh, M.A., 1976. Ultrastructural features of developing sieve elements in Lemna minor L.-the protoplast. American Journal of Botany, 63(8), pp.1145-1157.**

Google Scholar: [Author Only](#) [Title Only](#) [Author and Title](#)

**Muhonen M.I., Showman J.O., Couch R.I., 1983. Nutrient absorption by Spirodela polyrrhiza. Journal of Aquatic Plant Management, 21(2), pp.107-109.**

Google Scholar: [Author Only](#) [Title Only](#) [Author and Title](#)

**Prout, T., 1964. Observations on Structural Reduction in Evolution. The American Naturalist, 98(901), pp.239-249.**

Google Scholar: [Author Only](#) [Title Only](#) [Author and Title](#)

**Schindelin, J., Arganda-Carreras, I., Frise, E., Kaynig, V., Longair, M., Pietzsch, T., Preibisch, S., Rueden, C., Saalfeld, S., Schmid, B. and Tinevez, J.Y., 2012. Fiji: an open-source platform for biological-image analysis. Nature methods, 9(7), pp.676-682.**

Google Scholar: [Author Only](#) [Title Only](#) [Author and Title](#)

**Sherman, T., Bowling, A., Barger, T. and Vaughn, K., 2008. The Vestigial Root of Dodder (Cuscuta pentagona) Seedlings. International Journal of Plant Sciences, 169(8), pp.998-1012.**

Google Scholar: [Author Only](#) [Title Only](#) [Author and Title](#)

**Steiner, K.E., 1998. The evolution of beetle pollination in a South African orchid. American Journal of Botany, 85(8), pp.1180-1193.**

Google Scholar: [Author Only](#) [Title Only](#) [Author and Title](#)

**Stockey, R.A., Hoffman, G.L. and Rothwell, G.W., 1997. The fossil monocot Limnobiophyllum scutatum: resolving the phylogeny of Lemnaceae. American Journal of Botany, 84(3), pp.355-368.**

Google Scholar: [Author Only](#) [Title Only](#) [Author and Title](#)

**Tippery, N.P. and Les, D.H., 2020. Tiny plants with enormous potential: phylogeny and evolution of duckweeds. In The Duckweed Genomes (pp. 19-38). Springer, Cham.**

Google Scholar: [Author Only](#) [Title Only](#) [Author and Title](#)

**Vu, G.T., Fourounjian, P., Wang, W. and Cao, X.H., 2020. Future prospects of duckweed research and applications. The Duckweed Genomes, pp.179-185.**

Google Scholar: [Author Only](#) [Title Only](#) [Author and Title](#)

**Walker-Larsen, J. and Harder, L., 2001. Vestigial organs as opportunities for functional innovation: the example of the penstemon staminode. Evolution, 55(3), p.477.**

Google Scholar: [Author Only](#) [Title Only](#) [Author and Title](#)

**Watanabe, Y., Kabuki, T., Kakehashi, T., Kano-Nakata, M., Mitsuya, S. and Yamauchi, A., 2020. Morphological and histological differences among three types of component roots and their differential contribution to water uptake in the rice root system. Plant Production Science, 23(2), pp.191-201.**

Google Scholar: [Author Only](#) [Title Only](#) [Author and Title](#)

**Wilde, V., Kvaček, Z. and Bogner, J., 2005. Fossil leaves of the Araceae from the European Eocene and notes on other aroid fossils. International Journal of Plant Sciences, 166(1), pp.157-183.**

Google Scholar: [Author Only](#) [Title Only](#) [Author and Title](#)

**Yamamoto, Y., Stock, D. and Jeffery, W., 2004. Hedgehog signalling controls eye degeneration in blind cavefish. Nature, 431(7010), pp.844-847.**

**Yang, J., Li, G., Hu, S., Bishopp, A., Heenatigala, P., Kumar, S., Duan, P., Yao, L. and Hou, H., 2018. A protocol for efficient callus induction and stable transformation of Spirodela polyrrhiza (L.) Schleiden using Agrobacterium tumefaciens. Aquatic Botany, 151, pp.80-86.**

Google Scholar: [Author Only](#) [Title Only](#) [Author and Title](#)
